# Supplementary material
Source: MDPI journal article supplement (https://www.mdpi.com/2073-445X/11/9/1409)
Supplement: s1 [file s1]

## Supplementary data

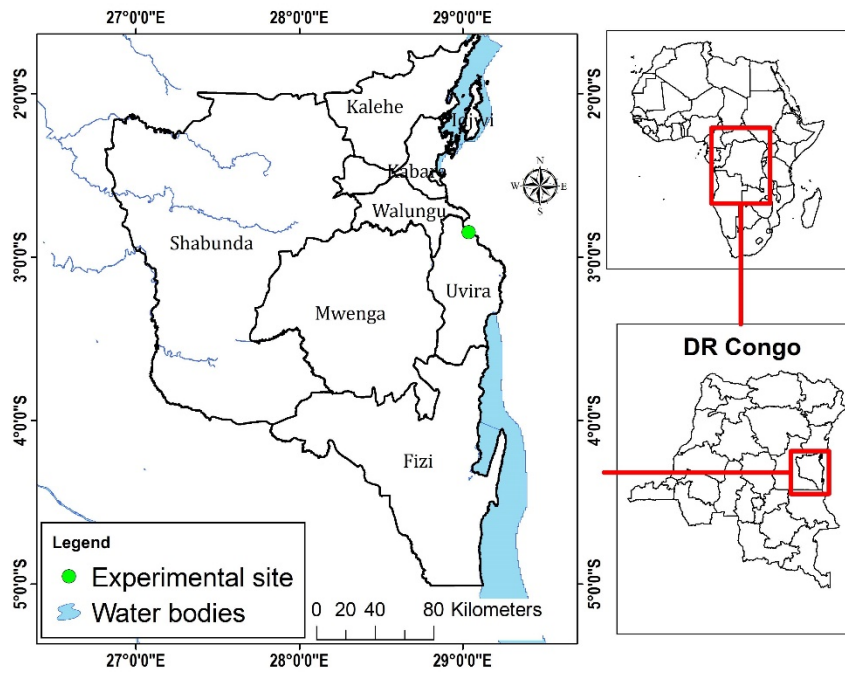

**Supplementary Figure S1.** Location of the experimental site, Ruzizi plain, eastern D.R. Congo

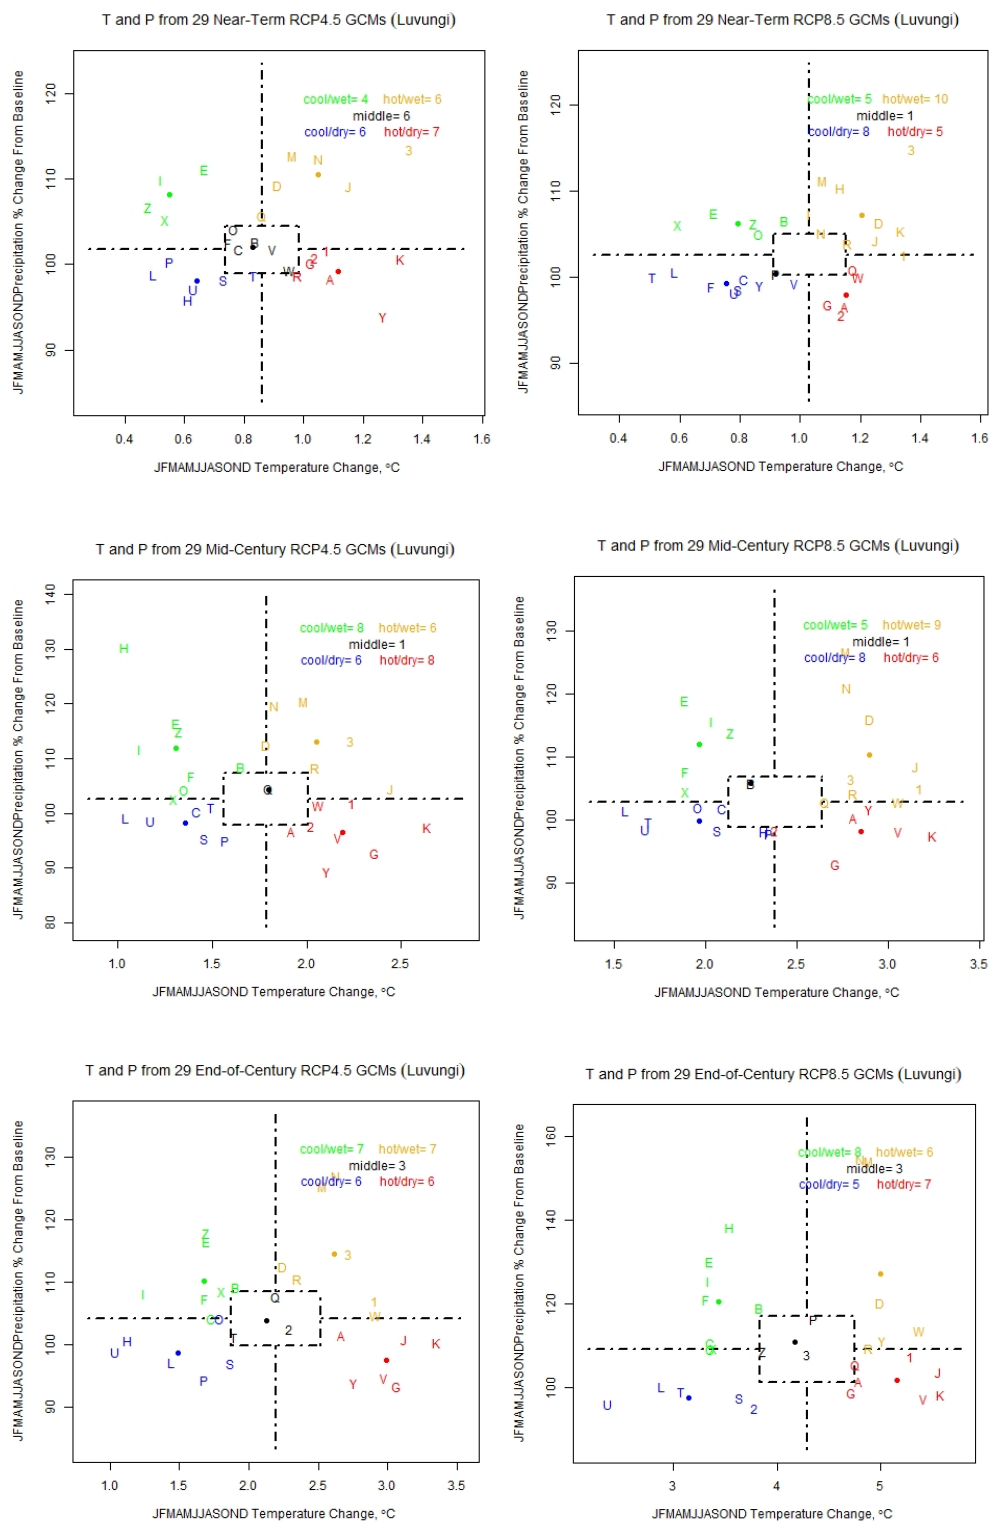

**Supplementary Figure S2.** Temperature-precipitation change scatter plots for selection of appropriate GCMs.

**Supplementary Table S1.** Summary of 29 CMIP5 GCMs that form the ensemble of climate projections that was used

| GCM code | GCM           | Institution                                                                                                                                           | Horizontal resolution                      | 2x [CO <sub>2</sub> ] Eq. climate Sens. (°C) |
|----------|---------------|-------------------------------------------------------------------------------------------------------------------------------------------------------|--------------------------------------------|----------------------------------------------|
| A        | ACCESS1-0     | Commonwealth Scientific and Industrial Research Organization (CSIRO) and Bureau of Meteorology (BOM), Australia                                       | $1.25^{\circ} \times 1.875^{\circ}$        | 3.8                                          |
| B        | BCC-CSM1-1    | Beijing Climate Center, China Meteorological Administration                                                                                           | $\sim 2.8^{\circ} \times 2.8^{\circ}$      | 2.8                                          |
| C        | BNU-ESM       | College of Global Change and Earth Systems Science, Beijing Normal University (BNU)                                                                   | $\sim 2.8^{\circ} \times 2.8^{\circ}$      | 4.1                                          |
| D        | CanESM2       | Canadian Centre for Climate Modelling & Analysis                                                                                                      | $\sim 2.8^{\circ} \times 2.8^{\circ}$      | 3.7                                          |
| E        | CCSM4         | US National Center for Atmospheric Research (NCAR)                                                                                                    | $\sim 0.9^{\circ} \times 1.25^{\circ}$     | 2.9                                          |
| F        | CESM1-BGC     | US National Science Foundation (NSF), US Department of Energy (DOE), and the US National Centre for Atmospheric Research (NCAR)                       | $\sim 0.9^{\circ} \times 1.25^{\circ}$     | n.a.                                         |
| G        | CSIRO-Mk3-6-0 | Queensland Climate Change Centre of Excellence and Commonwealth Scientific and Industrial Research Organization (CSIRO)                               | $\sim 1.9^{\circ} \times 1.875^{\circ}$    | 4.1                                          |
| H        | GFDL-ESM2G    | NOAA/Geophysical Fluid Dynamic Laboratory (GFDL)                                                                                                      | $\sim 2.0^{\circ} \times 2.5^{\circ}$      | 2.4                                          |
| I        | GFDL-ESM2M    | NOAA/Geophysical Fluid Dynamic Laboratory (GFDL)                                                                                                      | $\sim 2.0^{\circ} \times 2.5^{\circ}$      | 2.4                                          |
| J        | HadGEM2-CC    | UK Meteorological Office - Hadley Centre                                                                                                              | $1.25^{\circ} \times 1.875^{\circ}$        | n.a.                                         |
| K        | HadGEM2-ES    | UK Meteorological Office - Hadley Centre                                                                                                              | $1.25^{\circ} \times 1.875^{\circ}$        | 4.6                                          |
| L        | INM-CM4       | Russian Institute for Numerical Mathematics (INM)                                                                                                     | $1.5^{\circ} \times 2^{\circ}$             | 2.1                                          |
| M        | IPSL-CM5A-LR  | Institute Pierre Simon Laplace (IPSL)                                                                                                                 | $\sim 1.9^{\circ} \times 3.75^{\circ}$     | 4.1                                          |
| N        | IPSL-CM5A-MR  | Institute Pierre Simon Laplace (IPSL)                                                                                                                 | $\sim 1.3^{\circ} \times 2.5^{\circ}$      | n.a.                                         |
| O        | MIROC5        | University of Tokyo, Japanese National Institute for Environmental Studies (NIES), and Japan Agency for Marine-Earth Science and Technology (JAMSTEC) | $\sim 1.4^{\circ} \times \sim 1.4^{\circ}$ | 2.7                                          |
| P        | MIROC-ESM     | University of Tokyo, Japanese National Institute for Environmental Studies (NIES), and Japan Agency for Marine-Earth Science and Technology (JAMSTEC) | $\sim 2.8^{\circ} \times \sim 2.8^{\circ}$ | 4.7                                          |

|   |              |                                                                                            |                                         |      |
|---|--------------|--------------------------------------------------------------------------------------------|-----------------------------------------|------|
| Q | MPI-ESM-LR   | Max Planck Institute (MPI) for Meteorology (low resolution)                                | $\sim 1.9^{\circ} \times 1.875^{\circ}$ | 3.6  |
| R | MPI-ESM-MR   | Max Planck Institute (MPI) for Meteorology (mixed resolution)                              | $\sim 1.9^{\circ} \times 1.875^{\circ}$ | n.a. |
| S | MRI-CGCM3    | Japanese Meteorological Research Institute (MRI)                                           | $\sim 1.1^{\circ} \times 1.125^{\circ}$ | 2.6  |
| T | NorESM1-M    | Norwegian Climate Centre                                                                   | $\sim 1.9^{\circ} \times 2.5^{\circ}$   | 2.8  |
| U | FGOALS-g2    | Chinese Academy of Sciences                                                                | $\sim 2.8^{\circ} \times 2.8^{\circ}$   | n.a. |
| V | CMCC-CM      | Euro-Mediterranean Center on Climate Change                                                | $\sim 0.75^{\circ} \times 0.75^{\circ}$ | n.a. |
| W | CMCC-CMS     | Euro-Mediterranean Center on Climate Change                                                | $\sim 1.9^{\circ} \times 1.875^{\circ}$ | n.a. |
| X | CNRM-CM5     | France National Centre for Meteorological Research                                         | $\sim 1.4^{\circ} \times 1.4^{\circ}$   | 3.3  |
| Y | HadGEM2-AO   | UK Meteorological Office - Hadley Centre                                                   | $1.25^{\circ} \times 1.875^{\circ}$     | n.a. |
| Z | IPSL-CM5B-LR | Institute Pierre Simon Laplace (IPSL)                                                      | $\sim 1.9^{\circ} \times 3.75^{\circ}$  | 2.6  |
| 1 | GFDL-CM3     | NOAA/Geophysical Fluid Dynamic Laboratory (GFDL)                                           | $2.0^{\circ} \times 2.5^{\circ}$        | 4    |
| 2 | GISS-E2-R    | National Aeronautics and Space Association Goddard Institute for Space Studies (NASA GISS) | $2^{\circ} \times 2.5^{\circ}$          | 2.1  |
| 3 | GISS-E2-H    | National Aeronautics and Space Association Goddard Institute for Space Studies (NASA GISS) | $2^{\circ} \times 2.5^{\circ}$          | 2.3  |

Source: Rosenzweig and Hillel, 2015; Ruane et al. 2017
